# Supplementary material for: In situ formation of reduced graphene oxide structures in ceria by combined sol–gel and solvothermal processing
Source: publisher site journal article supplement (doi:10.3762/bjnano.7.174), 2016-11-23
Supplement: Additional file 1 [file 2190-4286-7-174-S1.pdf]

## **Supporting Information**

for

### **In situ formation of reduced graphene oxide structures in ceria by combined sol–gel and solvothermal processing**

Jingxia Yang<sup>1,2</sup>, Johannes Ofner<sup>3</sup>, Bernhard Lendl<sup>3</sup> and Ulrich Schubert\*<sup>1</sup>

Address: <sup>1</sup>Institute of Materials Chemistry, Vienna University of Technology, Getreidemarkt 9, 1060 Wien, Austria; <sup>2</sup>permanent address: College of Chemistry and Chemical Engineering, Shanghai University of Engineering Science, LongTeng Road 333, 201620 Shanghai, P.R. China and <sup>3</sup>Institute of Chemical Technologies and Analytics, Vienna University of Technology, Getreidemarkt 9, 1060 Wien, Austria

Email: Ulrich Schubert\* - Ulrich.Schubert@tuwien.ac.at

\* Corresponding author

### **Additional experimental data**

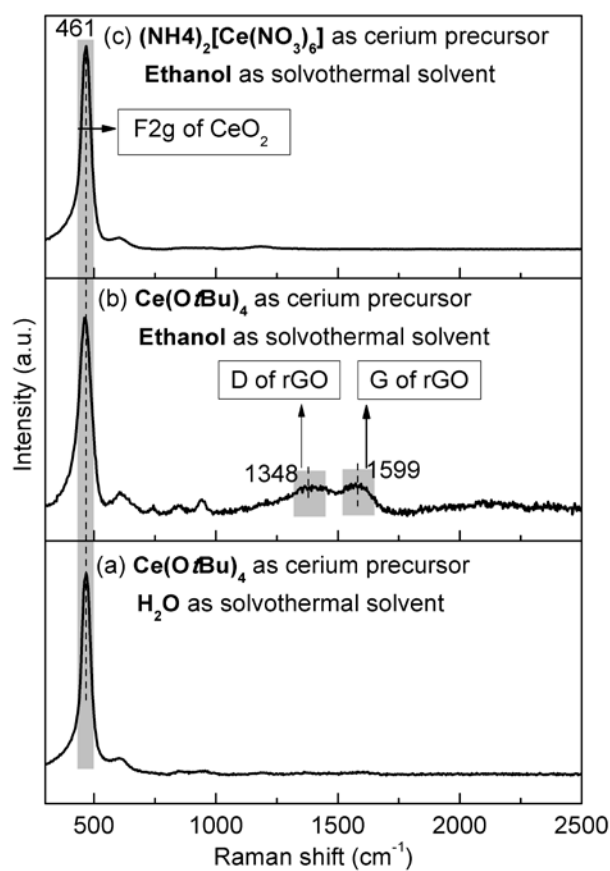

**Figure S1:** Raman spectra of ceria samples synthesized from different cerium precursors and different solvothermal solvents.

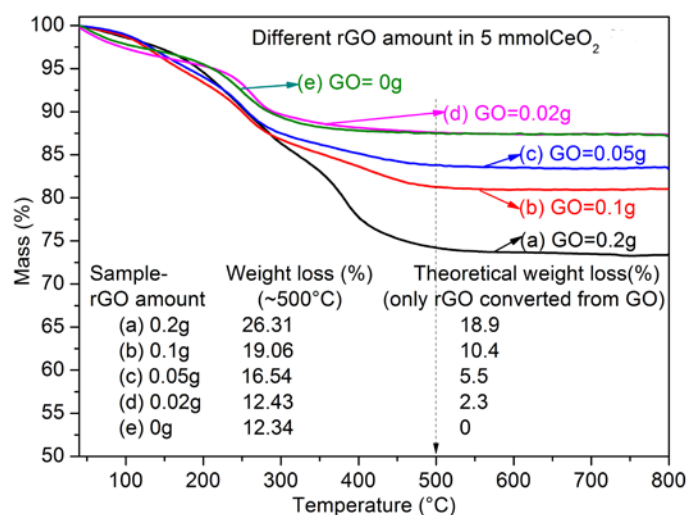

**Figure S2:** TGA curves of rGO–CeO<sub>2</sub> composites with different amounts of rGO after solvothermal treatment in ethanol.

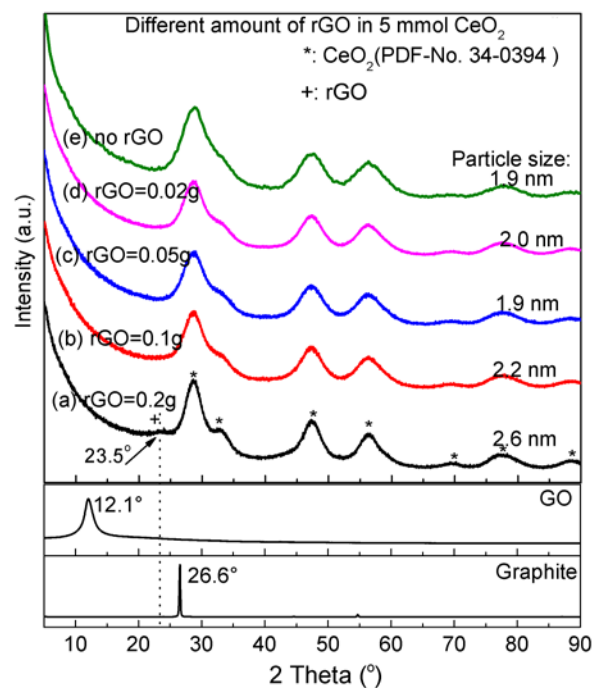

**Figure S3:** XRD patterns of graphite, GO and rGO–CeO<sub>2</sub> composites with different amounts of rGO amount after solvothermal treatment in ethanol.
